# Supplementary material for: Submillimeter postmortem and in vivo diffusion and susceptibility magnetic resonance imaging to characterize cortical micro- and meso-structures
Source: Research Square preprint supplement (doi:10.21203/rs.3.rs-9612742/v1), 2026-06-30
Supplement: Supplementary file 1 [file 65de56f81f04b61851ad5c62.pdf]

**Supplementary Table 1. 144 anatomical regions and Abbreviations from JHU-MNI atlas (Level 4)**

| <b>Regions</b>                  | <b>Abbreviations</b> |
|---------------------------------|----------------------|
| SUPERIOR FRONTAL GYRUS left     | SFG_L                |
| SUPERIOR FRONTAL GYRUS right    | SFG_R                |
| MIDDLE FRONTAL GYRUS left       | MFG_L                |
| MIDDLE FRONTAL GYRUS right      | MFG_R                |
| INFERIOR FRONTAL GYRUS left     | IFG_L                |
| INFERIOR FRONTAL GYRUS right    | IFG_R                |
| ORBITAL GYRUS left              | OG_L                 |
| ORBITAL GYRUS right             | OG_R                 |
| GYRUS RECTUS left               | RG_L                 |
| GYRUS RECTUS right              | RG_R                 |
| POSTCENTRAL GYRUS left          | PoCG_L               |
| POSTCENTRAL GYRUS right         | PoCG_R               |
| PRECENTRAL GYRUS left           | PrCG_L               |
| PRECENTRAL GYRUS right          | PrCG_R               |
| SUPERIOR PARIETAL GYRUS left    | SPG_L                |
| SUPERIOR PARIETAL GYRUS right   | SPG_R                |
| SUPRAMARGINAL GYRUS             | SMG_L                |
| SUPRAMARGINAL GYRUS right       | SMG_R                |
| ANGULAR GYRUS left              | AG_L                 |
| ANGULAR GYRUS right             | AG_R                 |
| PRE-CUNEUS left                 | PrCu_L               |
| PRE-CUNEUS right                | PrCu_R               |
| SUPERIOR TEMPORAL GYRUS left    | STG_L                |
| SUPERIOR TEMPORAL GYRUS right   | STG_R                |
| MIDDLE TEMPORAL GYRUS left      | MTG_L                |
| MIDDLE TEMPORAL GYRUS right     | MTG_R                |
| INFERIOR TEMPORAL GYRUS left    | ITG_L                |
| INFERIOR TEMPORAL GYRUS right   | ITG_R                |
| PARAHIPPOCAMPAL GYRUS left      | PHG_L                |
| PARAHIPPOCAMPAL GYRUS right     | PHG_R                |
| FUSIFORM GYRUS left             | FuG_L                |
| FUSIFORM GYRUS right            | FuG_R                |
| SUPERIOR OCCIPITAL GYRUS left   | SOG_L                |
| SUPERIOR OCCIPITAL GYRUS right  | SOG_R                |
| MIDDLE OCCIPITAL GYRUS left     | MOG_L                |
| MIDDLE OCCIPITAL GYRUS right    | MOG_R                |
| INFERIOR OCCIPITAL GYRUS left   | IOG_L                |
| INFERIOR OCCIPITAL GYRUS right  | IOG_R                |
| CUNEUS left                     | Cu_L                 |
| CUNEUS right                    | Cu_R                 |
| LINGUAL GYRUS left              | LG_L                 |
| LINGUAL GYRUS right             | LG_R                 |
| POSTERIOR CINGULATE GYRUS left  | PCG_L                |
| POSTERIOR CINGULATE GYRUS right | PCG_R                |

|                                                   |                  |
|---------------------------------------------------|------------------|
| INSULAR left                                      | Insula_L         |
| INSULAR right                                     | Insula_R         |
| AMYGDALA left                                     | Amyg_L           |
| AMYGDALA right                                    | Amyg_R           |
| HIPPOCAMPUS left                                  | Hippo_L          |
| HIPPOCAMPUS right                                 | Hippo_R          |
| CAUDATE NUCLEUS left                              | Caud_L           |
| CAUDATE NUCLEUS right                             | Caud_R           |
| PUTAMEN left                                      | Put_L            |
| PUTAMEN right                                     | Put_R            |
| GLOBUS PALLIDUS left                              | GP_L             |
| GLOBUS PALLIDUS right                             | GP_R             |
| THALAMUS left                                     | Thalamus_L       |
| THALAMUS right                                    | Thalamus_R       |
| Basal Forebrain left                              | BasalForebrain_L |
| Basal Forebrain right                             | BasalForebrain_R |
| Nucleus accumbens left                            | NucAccumbens_L   |
| Nucleus accumbens right                           | NucAccumbens_R   |
| MIDBRAIN left                                     | midbrain_L       |
| MIDBRAIN right                                    | midbrain_R       |
| Cerebellum left                                   | Cerebellum_L     |
| Cerebellum right                                  | Cerebellum_R     |
| PONS left                                         | Pons_L           |
| PONS right                                        | Pons_R           |
| MEDULLA left                                      | Medulla_L        |
| MEDULLA right                                     | Medulla_R        |
| Anterior Deep Periventricular White Matter left   | ant_DPWM_L       |
| Anterior Deep Periventricular White Matter right  | ant_DPWM_R       |
| Posterior Deep Periventricular White Matter left  | post_DPWM_L      |
| Posterior Deep Periventricular White Matter right | post_DPWM_R      |
| Genu of corpus callosum left                      | GCC_L            |
| Genu of corpus callosum right                     | GCC_R            |
| Body of corpus callosum left                      | BCC_L            |
| Body of corpus callosum right                     | BCC_R            |
| Splenium of corpus callosum left                  | SCC_L            |
| Splenium of corpus callosum right                 | SCC_R            |
| Tapetum left                                      | Tapetum_L        |
| Tapetum right                                     | Tapetum_R        |
| Anterior limb of internal capsule left            | ALIC_L           |
| Anterior limb of internal capsule right           | ALIC_R           |
| Posterior limb of internal capsule left           | PLIC_L           |
| Posterior limb of internal capsule right          | PLIC_R           |
| Inferior Deep Periventricular White Matter left   | inf_DPWM_L       |
| Inferior Deep Periventricular White Matter right  | inf_DPWM_R       |
| Cingulum (cingulate gyrus) left                   | CGC_L            |
| Cingulum (cingulate gyrus) right                  | CGC_R            |
| Cingulum (hippocampus) left                       | CGH_L            |
| Cingulum (hippocampus) right                      | CGH_R            |

|                                                  |                             |
|--------------------------------------------------|-----------------------------|
| Fornix/Stria terminalis left                     | Fx/ST_L                     |
| Fornix/Stria terminalis right                    | Fx/ST_R                     |
| Fornix (column and body of fornix) left          | Fx_L                        |
| Fornix (column and body of fornix) right         | Fx_R                        |
| Peripheral Parietal White Matter left            | PeripheralParietalWM_L      |
| Peripheral Parietal White Matter right           | PeripheralParietalWM_R      |
| Anterior Lateral Ventricle left                  | AnteriorLateralVentricle_L  |
| Anterior Lateral Ventricle right                 | AnteriorLateralVentricle_R  |
| Posterior Lateral Ventricle left                 | PosteriorLateralVentricle_L |
| Posterior Lateral Ventricle right                | PosteriorLateralVentricle_R |
| Inferior Lateral Ventricle left                  | InferiorLateralVentricle_L  |
| Inferior Lateral Ventricle right                 | InferiorLateralVentricle_R  |
| III ventricle                                    | III_ventricle               |
| Anterior periventricular white matter cap left   | PVWa_L                      |
| Anterior periventricular white matter cap right  | PVWa_R                      |
| Posterior periventricular white matter cap left  | PVWp_L                      |
| Posterior periventricular white matter cap right | PVWp_R                      |
| Peripheral Frontal White Matter left             | PeripheralFrontalWM_L       |
| Peripheral Frontal White Matter right            | PeripheralFrontalWM_R       |
| Peripheral Temporal White Matter left            | PeripheralTemporalWM_L      |
| Peripheral Temporal White Matter right           | PeripheralTemporalWM_R      |
| Peripheral Occipital White Matter left           | PeripheralOccipitalWM_L     |
| Peripheral Occipital White Matter right          | PeripheralOccipitalWM_R     |
| Peripheral Cingulate White Matter left           | PeripheralCingulateWM_L     |
| Peripheral Cingulate White Matter right          | PeripheralCingulateWM_R     |
| Cerebellum white matter left                     | CerebellumWM_R              |
| Cerebellum white matter right                    | CerebellumWM_L              |
| Frontal sulcus left                              | FrontSul_L                  |
| Frontal sulcus right                             | FrontSul_R                  |
| Central sulcus left                              | CentralSul_L                |
| Central sulcus right                             | CentralSul_R                |
| Sylvian frontal sulcus left                      | SylFrontSul_L               |
| Sylvian frontal sulcus right                     | SylFrontSul_R               |
| Sylvian temporal sulcus left                     | SylTempSul_L                |
| Sylvian temporal sulcus right                    | SylTempSul_R                |
| Sylvian parietal sulcus left                     | SylParieSul_L               |
| Sylvian parietal sulcus right                    | SylParieSul_R               |
| Parietal sulcus left                             | ParietSul_L                 |
| Parietal sulcus right                            | ParietSul_R                 |
| Cingulate sulcus left                            | CinguSul_L                  |
| Cingulate sulcus right                           | CinguSul_R                  |
| Occipital sulcus left                            | OcciptSul_L                 |
| Occipital sulcus right                           | OcciptSul_R                 |
| Temporal sulcus left                             | TempSul_L                   |
| Temporal sulcus right                            | TempSul_R                   |
| Caudate_tail_L                                   | Caudate_tail_L              |
| Caudate_tail_R                                   | Caudate_tail_R              |
| IV ventricle                                     | IV_ventricle                |

|                                        |                |
|----------------------------------------|----------------|
| Anterior external cranial space left   | ECSAnterior_L  |
| Posterior external cranial space right | ECSAnterior_R  |
| Anterior external cranial space left   | ECSPosterior_L |
| Posterior external cranial space right | ECSPosterior_R |

---

**Supplementary Table 2. Postmortem and in vivo regional values of FA and  $\chi$  values**

| Regions | Postmortem FA |            | In Vivo FA    |            | Postmortem $\chi$ |                  | In Vivo $\chi$ |                  |
|---------|---------------|------------|---------------|------------|-------------------|------------------|----------------|------------------|
|         | No. of Pixels | Mean Value | No. of Pixels | Mean Value | No. of Pixels     | Mean Value (ppb) | No. of Pixels  | Mean Value (ppb) |
| SFG_L   | 193044        | 0.16       | 232104        | 0.18       | 213737            | 1.97             | 213680         | 4.89             |
| SFG_R   | NA            | NA         | 247280        | 0.19       | NA                | NA               | 227984         | 3.88             |
| MFG_L   | 175071        | 0.17       | 217136        | 0.19       | 195330            | 2.21             | 195192         | 3.82             |
| MFG_R   | NA            | NA         | 213704        | 0.19       | NA                | NA               | 210384         | 3.92             |
| IFG_L   | 80965         | 0.15       | 90264         | 0.18       | 83242             | 1.92             | 83312          | 2.97             |
| IFG_R   | NA            | NA         | 87600         | 0.18       | NA                | NA               | 81480          | 2.56             |
| OG_L    | 70268         | 0.17       | 83864         | 0.16       | 85232             | 1.82             | 85232          | 3.14             |
| OG_R    | NA            | NA         | 78224         | 0.16       | NA                | NA               | 81456          | 3.28             |
| RG_L    | 38456         | 0.11       | 49032         | 0.16       | 48496             | 0.88             | 48584          | 4.95             |
| RG_R    | NA            | NA         | 54744         | 0.16       | NA                | NA               | 54816          | 5.62             |
| PoCG_L  | 89922         | 0.16       | 98280         | 0.18       | 96453             | 3.85             | 95840          | 4.25             |
| PoCG_R  | NA            | NA         | 86416         | 0.17       | NA                | NA               | 91680          | 3.27             |
| PrCG_L  | 115623        | 0.19       | 107008        | 0.21       | 93943             | 5.36             | 93816          | 7.54             |
| PrCG_R  | NA            | NA         | 135880        | 0.22       | NA                | NA               | 112528         | 8.02             |
| SPG_L   | 64976         | 0.18       | 67016         | 0.19       | 58168             | 3.62             | 58168          | 4.29             |
| SPG_R   | NA            | NA         | 54312         | 0.20       | NA                | NA               | 40576          | 4.29             |
| SMG_L   | 48179         | 0.15       | 85008         | 0.20       | 77208             | 4.06             | 77208          | 4.46             |
| SMG_R   | NA            | NA         | 86368         | 0.20       | NA                | NA               | 73592          | 3.55             |
| AG_L    | 87607         | 0.16       | 63064         | 0.19       | 63537             | 2.64             | 63112          | 4.25             |
| AG_R    | NA            | NA         | 106608        | 0.20       | NA                | NA               | 103520         | 3.28             |
| PrCu_L  | 67177         | 0.17       | 78768         | 0.20       | 79320             | 4.23             | 78696          | 3.28             |
| PrCu_R  | NA            | NA         | 75448         | 0.21       | NA                | NA               | 77576          | 2.85             |
| STG_L   | 116676        | 0.14       | 149920        | 0.19       | 134827            | 3.08             | 135880         | 3.56             |
| STG_R   | NA            | NA         | 141232        | 0.18       | NA                | NA               | 128056         | 2.57             |

|          |        |      |        |      |        |        |        |        |
|----------|--------|------|--------|------|--------|--------|--------|--------|
| MTG_L    | 107465 | 0.15 | 141936 | 0.20 | 127798 | 2.78   | 128264 | 3.40   |
| MTG_R    | NA     | NA   | 143696 | 0.19 | NA     | NA     | 119936 | 2.85   |
| ITG_L    | 65768  | 0.16 | 88840  | 0.16 | 95303  | 2.33   | 94680  | 4.42   |
| ITG_R    | NA     | NA   | 100216 | 0.15 | NA     | NA     | 99400  | 3.95   |
| PHG_L    | 12312  | 0.14 | 11576  | 0.16 | 12352  | 37.38  | 12352  | 5.03   |
| PHG_R    | NA     | NA   | 15160  | 0.15 | NA     | NA     | 14976  | 4.53   |
| FuG_L    | 86556  | 0.14 | 127288 | 0.15 | 142881 | 0.65   | 141896 | 2.72   |
| FuG_R    | NA     | NA   | 109816 | 0.16 | NA     | NA     | 108480 | 2.86   |
| SOG_L    | 18997  | 0.18 | 28688  | 0.20 | 27864  | 2.71   | 26920  | 2.37   |
| SOG_R    | NA     | NA   | 24680  | 0.20 | NA     | NA     | 25704  | 2.44   |
| MOG_L    | 113006 | 0.16 | 129208 | 0.20 | 131790 | 3.20   | 132552 | 3.52   |
| MOG_R    | NA     | NA   | 121320 | 0.20 | NA     | NA     | 126784 | 4.90   |
| IOG_L    | 29719  | 0.17 | 32464  | 0.17 | 34824  | 3.74   | 34824  | 5.04   |
| IOG_R    | NA     | NA   | 34904  | 0.18 | NA     | NA     | 37280  | 5.10   |
| Cu_L     | 55425  | 0.18 | 62584  | 0.22 | 72323  | 4.12   | 72016  | 4.42   |
| Cu_R     | NA     | NA   | 54304  | 0.21 | NA     | NA     | 62528  | 4.05   |
| LG_L     | 39945  | 0.15 | 67512  | 0.17 | 82562  | 1.82   | 82712  | 4.73   |
| LG_R     | NA     | NA   | 63704  | 0.17 | NA     | NA     | 72176  | 4.59   |
| PCG_L    | 109277 | 0.16 | 151336 | 0.19 | 139845 | 1.33   | 140816 | 2.42   |
| PCG_R    | NA     | NA   | 141952 | 0.21 | NA     | NA     | 131008 | 2.59   |
| Insula_L | 77743  | 0.15 | 61040  | 0.19 | 62034  | 0.83   | 60232  | 1.96   |
| Insula_R | NA     | NA   | 65320  | 0.20 | NA     | NA     | 62864  | 1.95   |
| Amyg_L   | 7368   | 0.12 | 14392  | 0.21 | 14768  | -24.61 | 14768  | -6.34  |
| Amyg_R   | NA     | NA   | 15856  | 0.20 | NA     | NA     | 17160  | -0.24  |
| Hippo_L  | 22416  | 0.18 | 30232  | 0.22 | 29968  | -13.12 | 29968  | 2.45   |
| Hippo_R  | NA     | NA   | 29744  | 0.21 | NA     | NA     | 28904  | 2.26   |
| Caud_L   | 31633  | 0.25 | 29560  | 0.21 | 30368  | 12.70  | 30152  | 34.90  |
| Caud_R   | NA     | NA   | 29528  | 0.19 | NA     | NA     | 31120  | 33.30  |
| Put_L    | 33807  | 0.21 | 39424  | 0.22 | 37409  | 61.60  | 37314  | 51.40  |
| Put_R    | NA     | NA   | 38016  | 0.20 | NA     | NA     | 36624  | 49.20  |
| GP_L     | 6949   | 0.28 | 12624  | 0.28 | 12393  | 152.30 | 11716  | 119.80 |

|                  |        |      |        |      |        |        |        |        |
|------------------|--------|------|--------|------|--------|--------|--------|--------|
| GP_R             | NA     | NA   | 12408  | 0.28 | NA     | NA     | 12296  | 117.90 |
| Thalamus_L       | 21991  | 0.21 | 50984  | 0.28 | 55226  | -1.63  | 54816  | -4.83  |
| Thalamus_R       | NA     | NA   | 52840  | 0.27 | NA     | NA     | 52856  | 3.34   |
| BasalForebrain_L | 12970  | 0.26 | 21688  | 0.31 | 22312  | 20.60  | 22312  | 5.36   |
| BasalForebrain_R | NA     | NA   | 22192  | 0.31 | NA     | NA     | 24016  | 5.55   |
| NucAccumbens_L   | 1836   | 0.15 | 5048   | 0.19 | 2672   | 1.11   | 2672   | 11.00  |
| NucAccumbens_R   | NA     | NA   | 5640   | 0.20 | NA     | NA     | 4392   | 4.27   |
| midbrain_L       | 23608  | 0.38 | 41936  | 0.44 | 41680  | 19.20  | 41680  | -0.52  |
| midbrain_R       | NA     | NA   | 42328  | 0.43 | NA     | NA     | 41688  | 0.17   |
| Cerebellum_L     | 250360 | 0.17 | 491280 | 0.22 | 375864 | 0.66   | 375864 | -3.66  |
| Cerebellum_R     | NA     | NA   | 472056 | 0.19 | NA     | NA     | 421840 | -2.58  |
| Pons_L           | 40488  | 0.41 | 67856  | 0.44 | 67704  | -0.55  | 67704  | -11.20 |
| Pons_R           | NA     | NA   | 73680  | 0.44 | NA     | NA     | 75232  | -10.84 |
| Medulla_L        | 1344   | 0.19 | 16760  | 0.34 | 10680  | -0.86  | 10680  | -4.70  |
| Medulla_R        | NA     | NA   | 19560  | 0.36 | NA     | NA     | 12576  | -3.60  |
| ant_DPWM_L       | 164414 | 0.25 | 232248 | 0.43 | 222317 | -21.78 | 222832 | -16.43 |
| ant_DPWM_R       | NA     | NA   | 235536 | 0.44 | NA     | NA     | 221568 | -15.95 |
| post_DPWM_L      | 40059  | 0.22 | 42160  | 0.45 | 42521  | -21.74 | 41976  | -21.50 |
| post_DPWM_R      | NA     | NA   | 35200  | 0.49 | NA     | NA     | 37000  | -18.07 |
| GCC_L            | 18073  | 0.40 | 21992  | 0.64 | 21988  | -5.20  | 21912  | -14.60 |
| GCC_R            | NA     | NA   | 21480  | 0.66 | NA     | NA     | 22480  | -14.80 |
| BCC_L            | 24936  | 0.39 | 28600  | 0.64 | 30204  | -4.36  | 29864  | -26.85 |
| BCC_R            | NA     | NA   | 27824  | 0.64 | NA     | NA     | 29584  | -29.82 |
| SCC_L            | 41236  | 0.30 | 45160  | 0.61 | 45980  | -4.07  | 46320  | -21.12 |
| SCC_R            | NA     | NA   | 46904  | 0.63 | NA     | NA     | 48600  | -19.55 |
| Tapetum_L        | 1311   | 0.31 | 1632   | 0.39 | 1488   | -15.11 | 1544   | 2.13   |
| Tapetum_R        | NA     | NA   | 1176   | 0.27 | NA     | NA     | 1008   | 25.50  |
| ALIC_L           | 6316   | 0.25 | 19376  | 0.47 | 20986  | 35.70  | 20687  | 19.60  |
| ALIC_R           | NA     | NA   | 19624  | 0.48 | NA     | NA     | 19768  | 8.14   |
| PLIC_L           | 3882   | 0.29 | 25808  | 0.53 | 29434  | -17.27 | 29127  | -15.49 |
| PLIC_R           | NA     | NA   | 26216  | 0.52 | NA     | NA     | 28912  | -22.20 |

|                             |        |      |        |      |        |        |        |        |
|-----------------------------|--------|------|--------|------|--------|--------|--------|--------|
| inf_DPWM_L                  | 80231  | 0.39 | 169112 | 0.49 | 173082 | -11.74 | 173668 | -14.81 |
| inf_DPWM_R                  | NA     | NA   | 142760 | 0.50 | NA     | NA     | 144440 | -14.98 |
| CGC_L                       | 11745  | 0.39 | 23336  | 0.45 | 21692  | 3.75   | 21608  | -2.73  |
| CGC_R                       | NA     | NA   | 24888  | 0.44 | NA     | NA     | 23984  | -6.00  |
| CGH_L                       | 2822   | 0.27 | 12624  | 0.37 | 12244  | -5.90  | 12344  | 16.50  |
| CGH_R                       | NA     | NA   | 12592  | 0.41 | NA     | NA     | 13576  | 11.90  |
| Fx/ST_L                     | 6640   | 0.11 | 11728  | 0.41 | 11148  | -0.30  | 11208  | -0.55  |
| Fx/ST_R                     | NA     | NA   | 11312  | 0.47 | NA     | NA     | 11360  | 3.96   |
| Fx_L                        | 2334   | 0.27 | 4136   | 0.46 | 4456   | -2.68  | 4400   | -16.91 |
| Fx_R                        | NA     | NA   | 5128   | 0.50 | NA     | NA     | 5008   | -27.05 |
| PeripheralParietalWM_L      | 158096 | 0.18 | 291576 | 0.41 | 275990 | 1.41   | 273280 | -1.51  |
| PeripheralParietalWM_R      | NA     | NA   | 293432 | 0.41 | NA     | NA     | 264344 | -2.83  |
| AnteriorLateralVentricle_L  | 79315  | 0.18 | 33392  | 0.21 | 34218  | 0.78   | 34472  | 9.30   |
| AnteriorLateralVentricle_R  | NA     | NA   | 30024  | 0.21 | NA     | NA     | 30984  | 4.19   |
| PosteriorLateralVentricle_L | 32645  | 0.14 | 11960  | 0.29 | 15555  | -5.30  | 14712  | 12.30  |
| PosteriorLateralVentricle_R | NA     | NA   | 8736   | 0.20 | NA     | NA     | 9992   | 7.19   |
| InferiorLateralVentricle_L  | 7343   | 0.10 | 4048   | 0.25 | 5312   | -12.28 | 5312   | 1.43   |
| InferiorLateralVentricle_R  | NA     | NA   | 7424   | 0.25 | NA     | NA     | 9040   | 7.15   |
| III_ventricle               | 18316  | 0.20 | 12472  | 0.27 | 10758  | 6.46   | 10808  | -16.98 |
| PVWa_L                      | 8997   | 0.22 | 5120   | 0.28 | 4400   | 4.89   | 4448   | -2.50  |
| PVWa_R                      | NA     | NA   | 5608   | 0.24 | NA     | NA     | 6264   | -1.83  |
| PVWp_L                      | 3940   | 0.27 | 3016   | 0.32 | 3178   | 1.26   | 3248   | 25.40  |
| PVWp_R                      | NA     | NA   | 2824   | 0.34 | NA     | NA     | 2472   | 40.50  |
| PeripheralFrontalWM_L       | 232218 | 0.25 | 419280 | 0.40 | 355450 | -3.01  | 357432 | 0.74   |
| PeripheralFrontalWM_R       | NA     | NA   | 438960 | 0.39 | NA     | NA     | 366536 | -0.64  |
| PeripheralTemporalWM_L      | 141510 | 0.27 | 210488 | 0.38 | 180730 | -0.82  | 180000 | 1.40   |
| PeripheralTemporalWM_R      | NA     | NA   | 223816 | 0.38 | NA     | NA     | 168064 | 1.35   |
| PeripheralOccipitalWM_L     | 76792  | 0.30 | 209536 | 0.37 | 208333 | -1.57  | 210464 | -6.02  |
| PeripheralOccipitalWM_R     | NA     | NA   | 214272 | 0.39 | NA     | NA     | 212736 | -7.25  |
| PeripheralCingulateWM_L     | 9240   | 0.38 | 34056  | 0.41 | 30568  | -2.85  | 30840  | 2.58   |
| PeripheralCingulateWM_R     | NA     | NA   | 25512  | 0.40 | NA     | NA     | 23808  | 8.60   |

|                |        |      |        |      |        |        |        |        |
|----------------|--------|------|--------|------|--------|--------|--------|--------|
| CerebellumWM_R | NA     | NA   | 100160 | 0.38 | NA     | NA     | 71112  | 9.75   |
| CerebellumWM_L | 21392  | 0.10 | 95080  | 0.39 | 30096  | -6.37  | 30096  | 3.00   |
| FrontSul_L     | 237688 | 0.12 | 154392 | 0.14 | 159347 | 2.04   | 159736 | -1.27  |
| FrontSul_R     | NA     | NA   | 105448 | 0.14 | NA     | NA     | 132976 | 1.42   |
| CentralSul_L   | 30240  | 0.12 | 20200  | 0.15 | 24520  | 9.45   | 24520  | 3.78   |
| CentralSul_R   | NA     | NA   | 18400  | 0.16 | NA     | NA     | 23104  | 4.86   |
| SylFrontSul_L  | 34328  | 0.11 | 12848  | 0.17 | 21307  | 2.71   | 21456  | -4.66  |
| SylFrontSul_R  | NA     | NA   | 9904   | 0.17 | NA     | NA     | 25144  | -8.74  |
| SylTempSul_L   | 29678  | 0.08 | 26152  | 0.19 | 29560  | 8.65   | 30088  | -1.35  |
| SylTempSul_R   | NA     | NA   | 19048  | 0.18 | NA     | NA     | 29784  | -9.98  |
| SylParieSul_L  | 8731   | 0.15 | 3504   | 0.19 | 3144   | -0.69  | 3144   | -2.22  |
| SylParieSul_R  | NA     | NA   | 1704   | 0.16 | NA     | NA     | 1688   | -5.63  |
| ParietSul_L    | 134652 | 0.08 | 74976  | 0.16 | 83256  | 5.98   | 83256  | 0.00   |
| ParietSul_R    | NA     | NA   | 73512  | 0.15 | NA     | NA     | 86432  | 0.67   |
| CinguSul_L     | 28884  | 0.20 | 24152  | 0.17 | 29304  | 2.14   | 29304  | 9.76   |
| CinguSul_R     | NA     | NA   | 23160  | 0.18 | NA     | NA     | 32568  | 5.42   |
| OcciptSul_L    | 58472  | 0.14 | 13392  | 0.17 | 18090  | 3.92   | 18208  | 2.50   |
| OcciptSul_R    | NA     | NA   | 14240  | 0.20 | NA     | NA     | 18128  | -1.80  |
| TempSul_L      | 23304  | 0.08 | 9248   | 0.20 | 10500  | 0.43   | 10536  | -7.89  |
| TempSul_R      | NA     | NA   | 9400   | 0.20 | NA     | NA     | 14120  | -12.46 |
| Caudate_tail_L | 3528   | 0.20 | 2896   | 0.27 | 2768   | -16.04 | 2768   | -4.19  |
| Caudate_tail_R | NA     | NA   | 3128   | 0.31 | NA     | NA     | 2808   | -3.49  |
| IV_ventricle   | 10768  | 0.19 | 14240  | 0.22 | 13640  | -5.49  | 13640  | 30.80  |
| ECSAnterior_L  | 72565  | 0.14 | 20008  | 0.10 | 1624   | -0.77  | 1624   | -11.92 |
| ECSAnterior_R  | NA     | NA   | 15096  | 0.11 | NA     | NA     | 800    | 3.68   |
| ECSPosterior_L | 68943  | 0.14 | 12032  | 0.12 | 240    | 0.25   | 240    | 7.28   |
| ECSPosterior_R | NA     | NA   | 6224   | 0.12 | NA     | NA     | 56     | -3.80  |

---

**Supplementary Table 3: Equipment explanation**

| <b>Equipment</b>                                    | <b>Explanations</b>                                                             |
|-----------------------------------------------------|---------------------------------------------------------------------------------|
| FreeCAD (ver. 0.21.0, 2023)                         | Free and open-source software for 3D modeling and design                        |
| Ultimaker 2 Extended+ B.V.                          | 3D extruder printer used to create large-scale objects                          |
| Cura (ver. 5.4.0)                                   | Open-source slicing software used to prepare the models for printing            |
| 1-gallon, wide-mouth, plastic bucket                | To fix the brain sample in plentiful 10% phosphate-buffered formalin solution   |
| Chemical-resistant gloves and lab coats             | Chemical-resistant gloves and other protective clothing should be worn          |
| Face shields                                        | Face shields should always be worn while handling formalin solutions            |
| 100 ml syringe                                      | To pour Fomblin™ into the container from the top holes                          |
| 27-gauge needle and 1 ml syringe                    | To aspirate air bubbles trapped in the ventricles or along the cortical surface |
| Refrigerator                                        | To keep the brain in phosphate-buffered saline at 35°F                          |
| Polycarbonate desiccator (330 mm × 330 mm × 245 mm) | Vacuum chamber to remove air bubbles from the brain and the container           |

**Supplementary Table 4: Material explanation**

| <b>Materials</b>                                   | <b>Explanations</b>                                                                    |
|----------------------------------------------------|----------------------------------------------------------------------------------------|
| 10% phosphate-buffered formalin solution           | pH-neutral solution for histological brain tissue fixation                             |
| Phosphate-buffered saline                          | Buffer solution for maintaining the pH and osmolarity to prevent changes in tissues    |
| Gadopentetate dimeglumine                          | MRI contrast agents to shorten repetition time without compromising diffusion measures |
| Liquid perfluoropolyether (Fomblin <sup>TM</sup> ) | Proton-free liquid to reduce magnetic susceptibility artifacts                         |
| Polylactic acid filaments                          | Biodegradable and eco-friendly filaments as the printing materials                     |
| Small plugs of plastic epoxy                       | To seal the spout and any other openings on the lid of the ellipsoid-shaped container  |
| Plastic pipes and pins                             | To support and pad the brain sample in the container and keep it stable                |
| Polyurethane adhesive (Gorilla <sup>TM</sup> )     | To attach the outer lid to the bottom piece of the container                           |
| Spray sealant adhesive (Permatex <sup>TM</sup> )   | To seal potential gaps between the outer lid and the bottom piece of the container     |

**Supplementary Fig. 1: Region-wise comparisons of postmortem vs. in vivo FA and  $\chi$  values with anatomical labels, shown separately for deep gray matter and white matter regions**

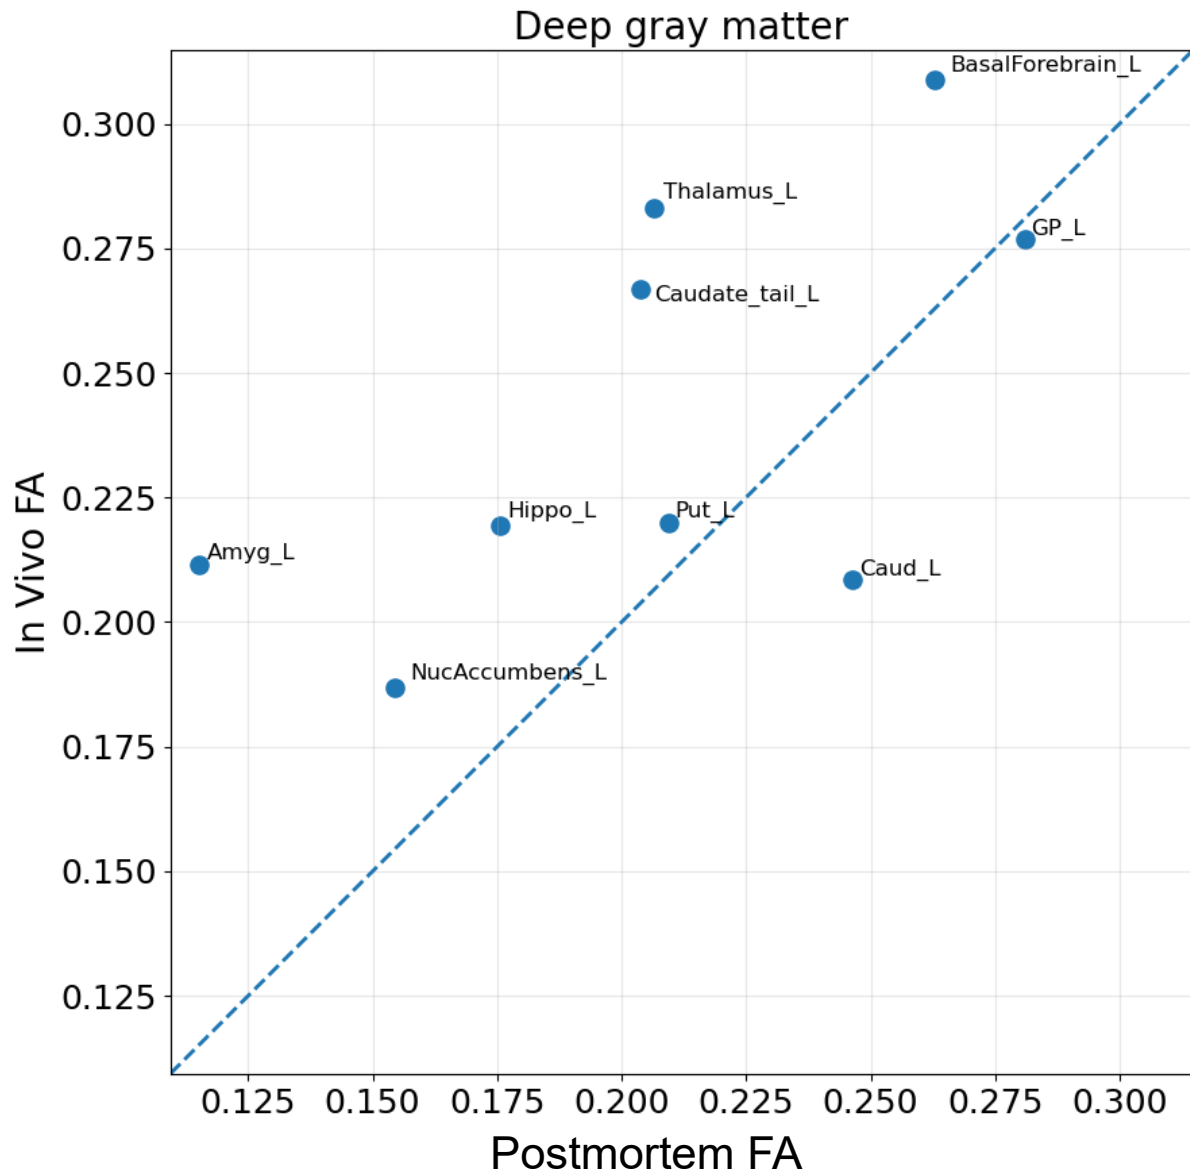

(Pearson's  $r = 0.63$ ,  $p = 0.067$ )

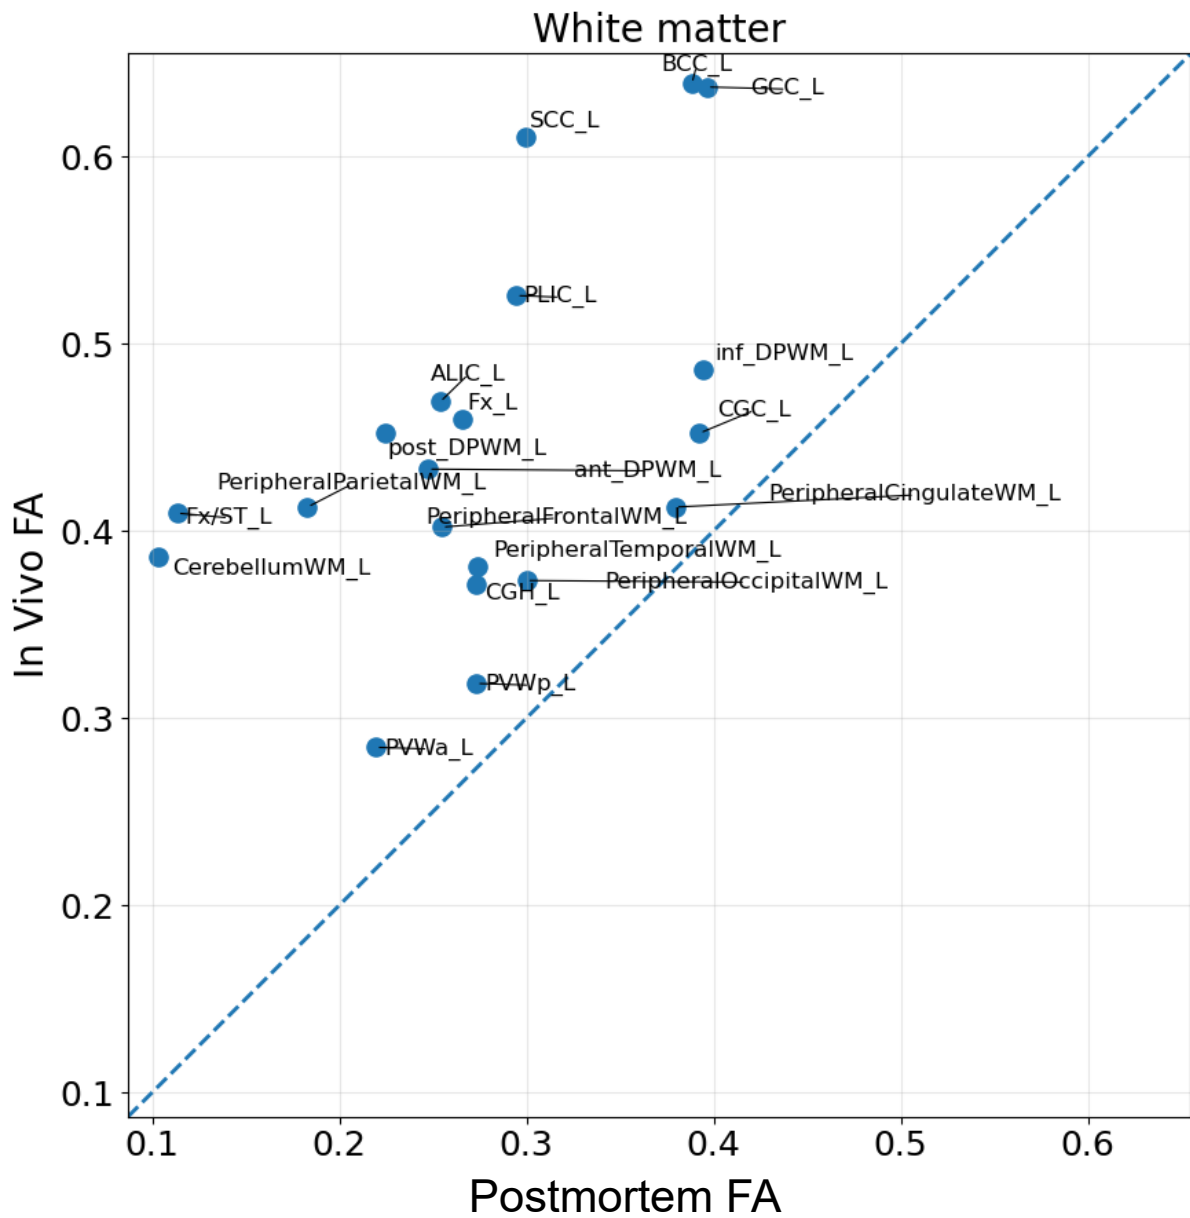

(Pearson's  $r = 0.51$ ,  $p = 0.022$ )

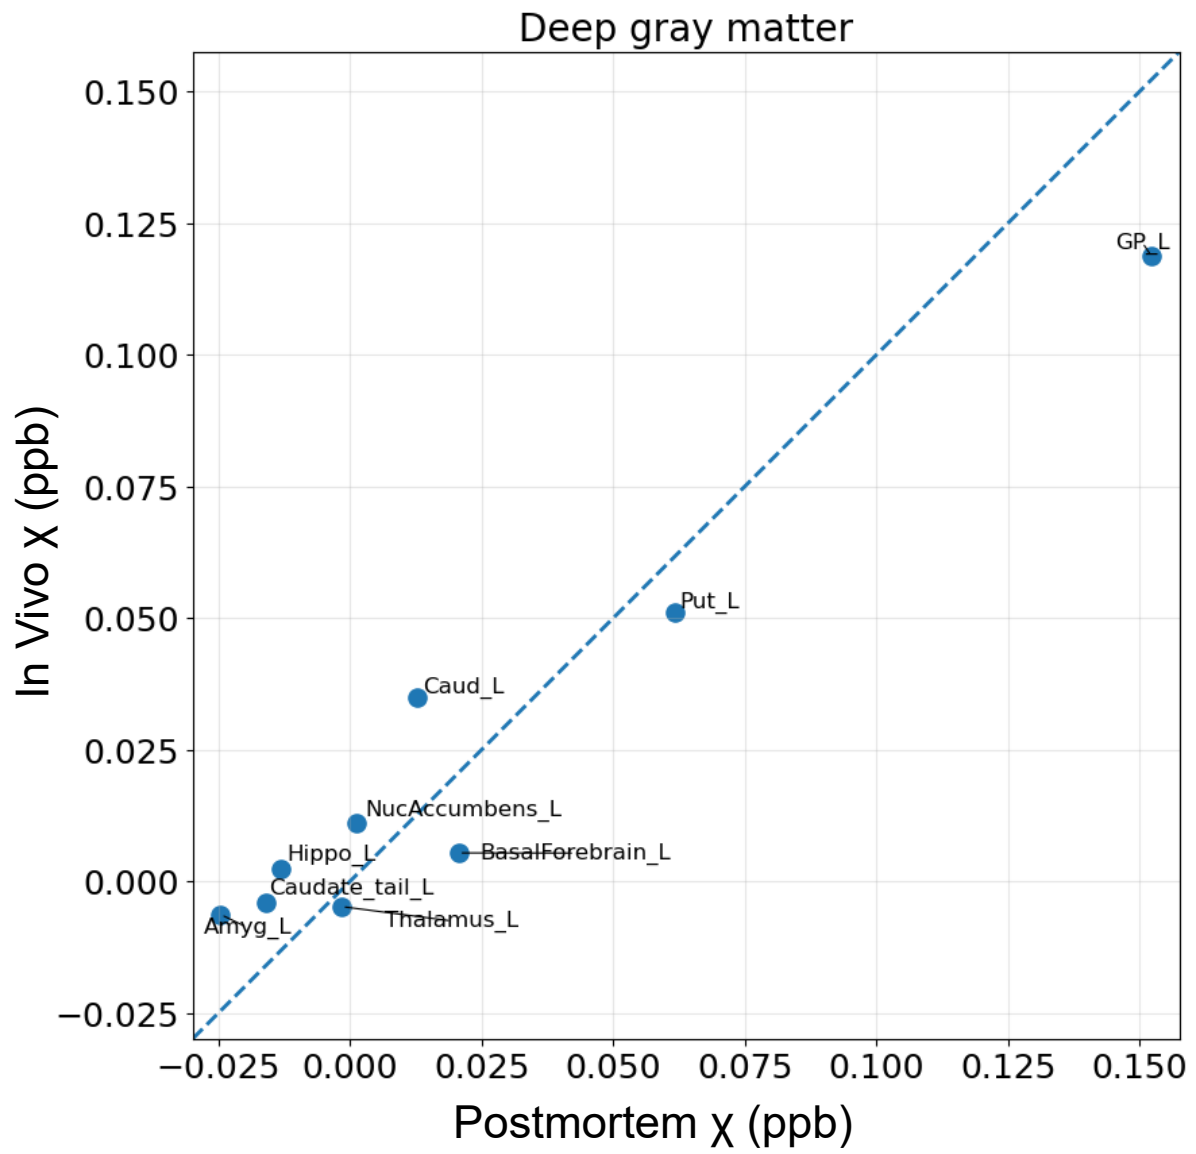

(Pearson's  $r = 0.97$ ,  $p = 1.525 \times 10^{-5}$ )

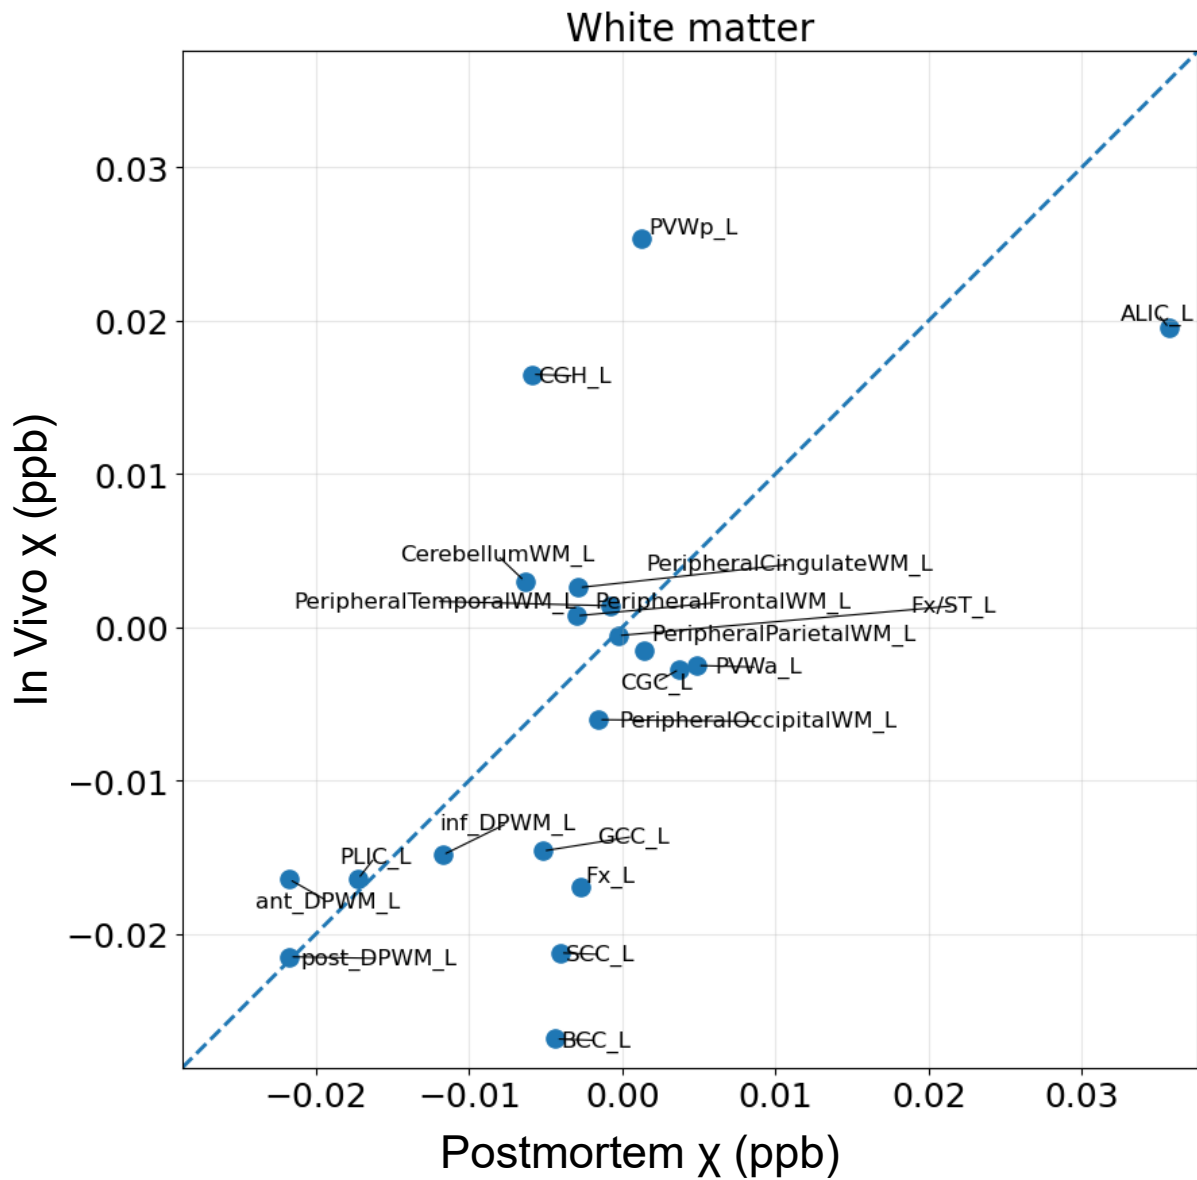

(Pearson's  $r = 0.60$ ,  $p = 0.005$ )

**Supplementary Fig. 2: Multiple hierarchical structural levels**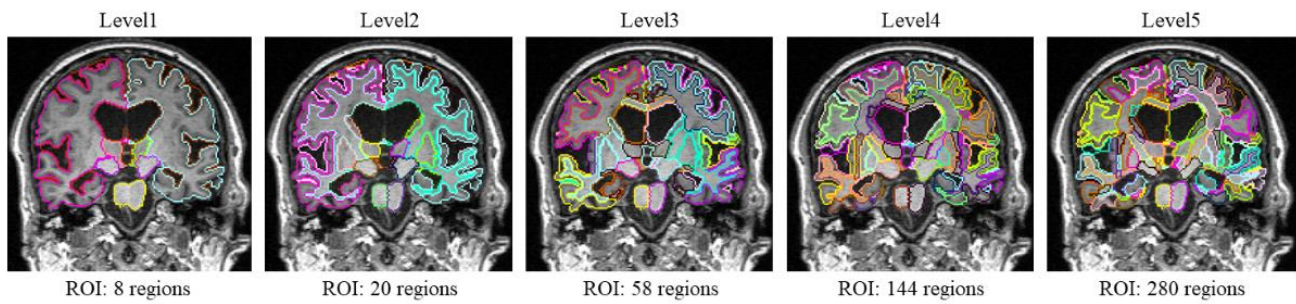

(<https://github.com/OishiLab/OpenMAP-T1>)

OpenMAP-T1 parcellates a whole brain into five hierarchical structural levels (Level 1: Hemispheric level; Level 2: Gray and white matter segmentation level; Level 3: Lobar level; Level 4: Coarse parcellation level; Level 5: Fine parcellation level).
